# Supplementary material
Source: Springer Nature journal article supplement (https://www.springermedizin.de/resource/supplementary/12936_2013_2883_MOESM4_ESM.pdf/9544476)

# Additional file 4 Asymptomatic parasite prevalence at different study sites in 2010 (A) and 2011 (B)

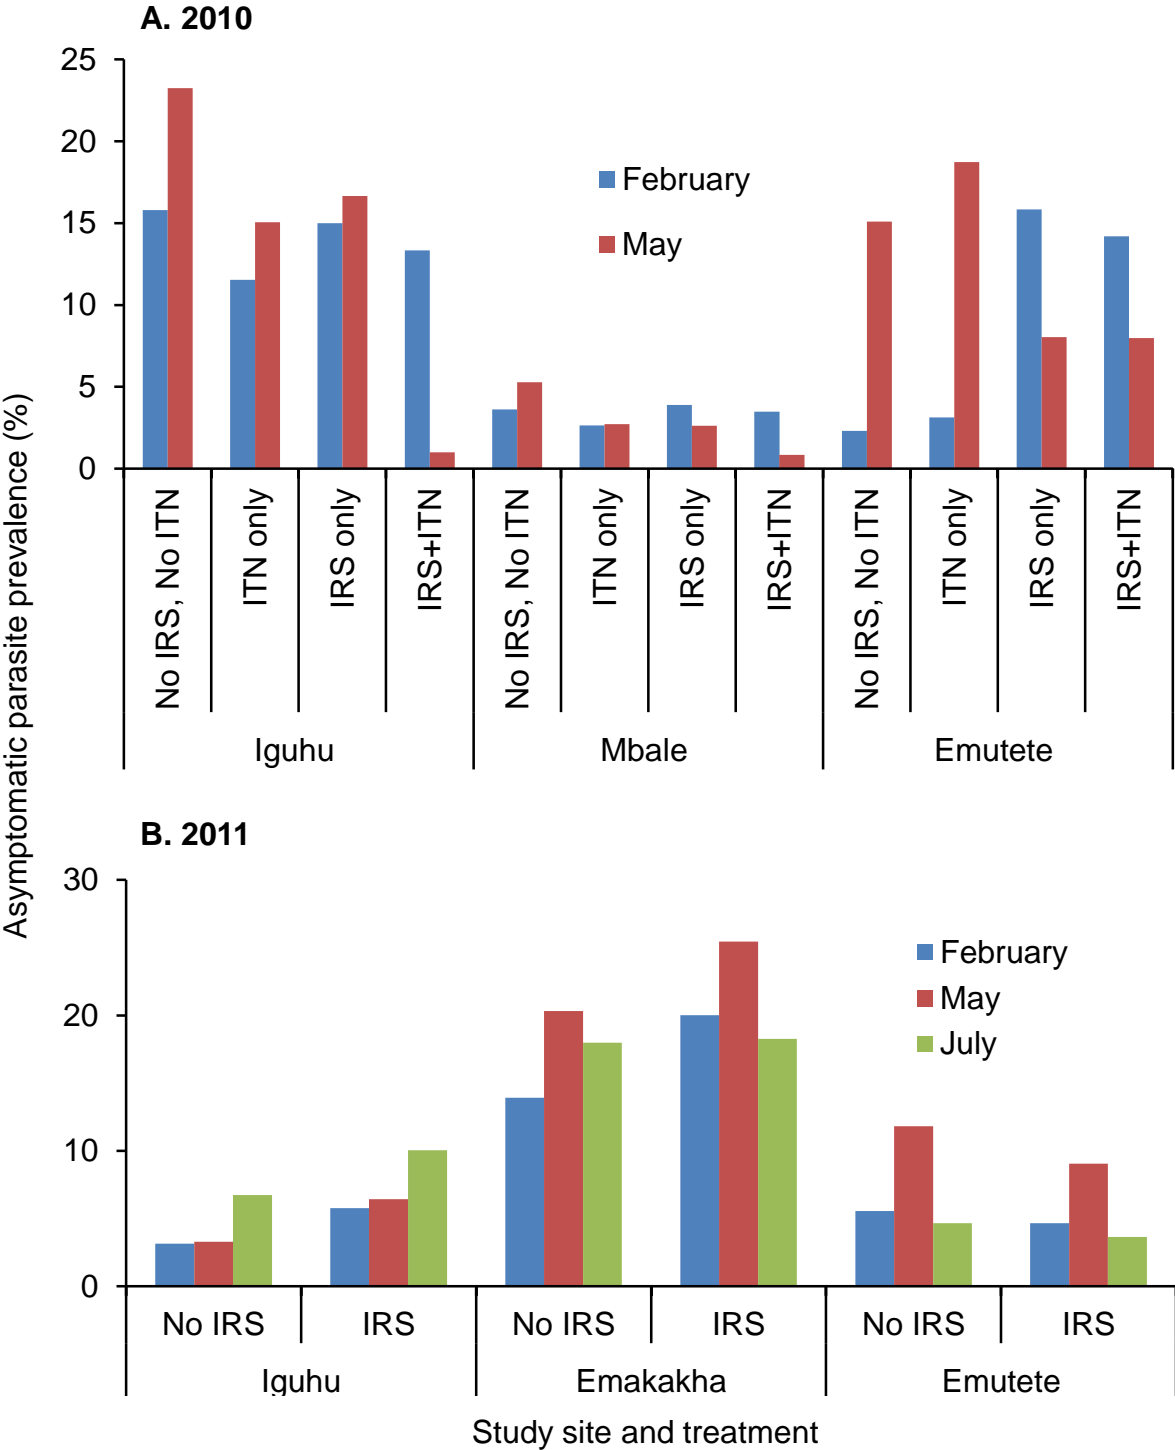

Supplement: MOESM4 [file 9544476]
